# Supplementary material for: The causal relationship between air pollution, obesity, and COVID-19 risk: a large-scale genetic correlation study
Source: PubMed Central journal article supplement (PMC10585274; doi:10.3389/fendo.2023.1221442), 2023-10-05
Supplement: Image_1.pdf [file Image_1.pdf]

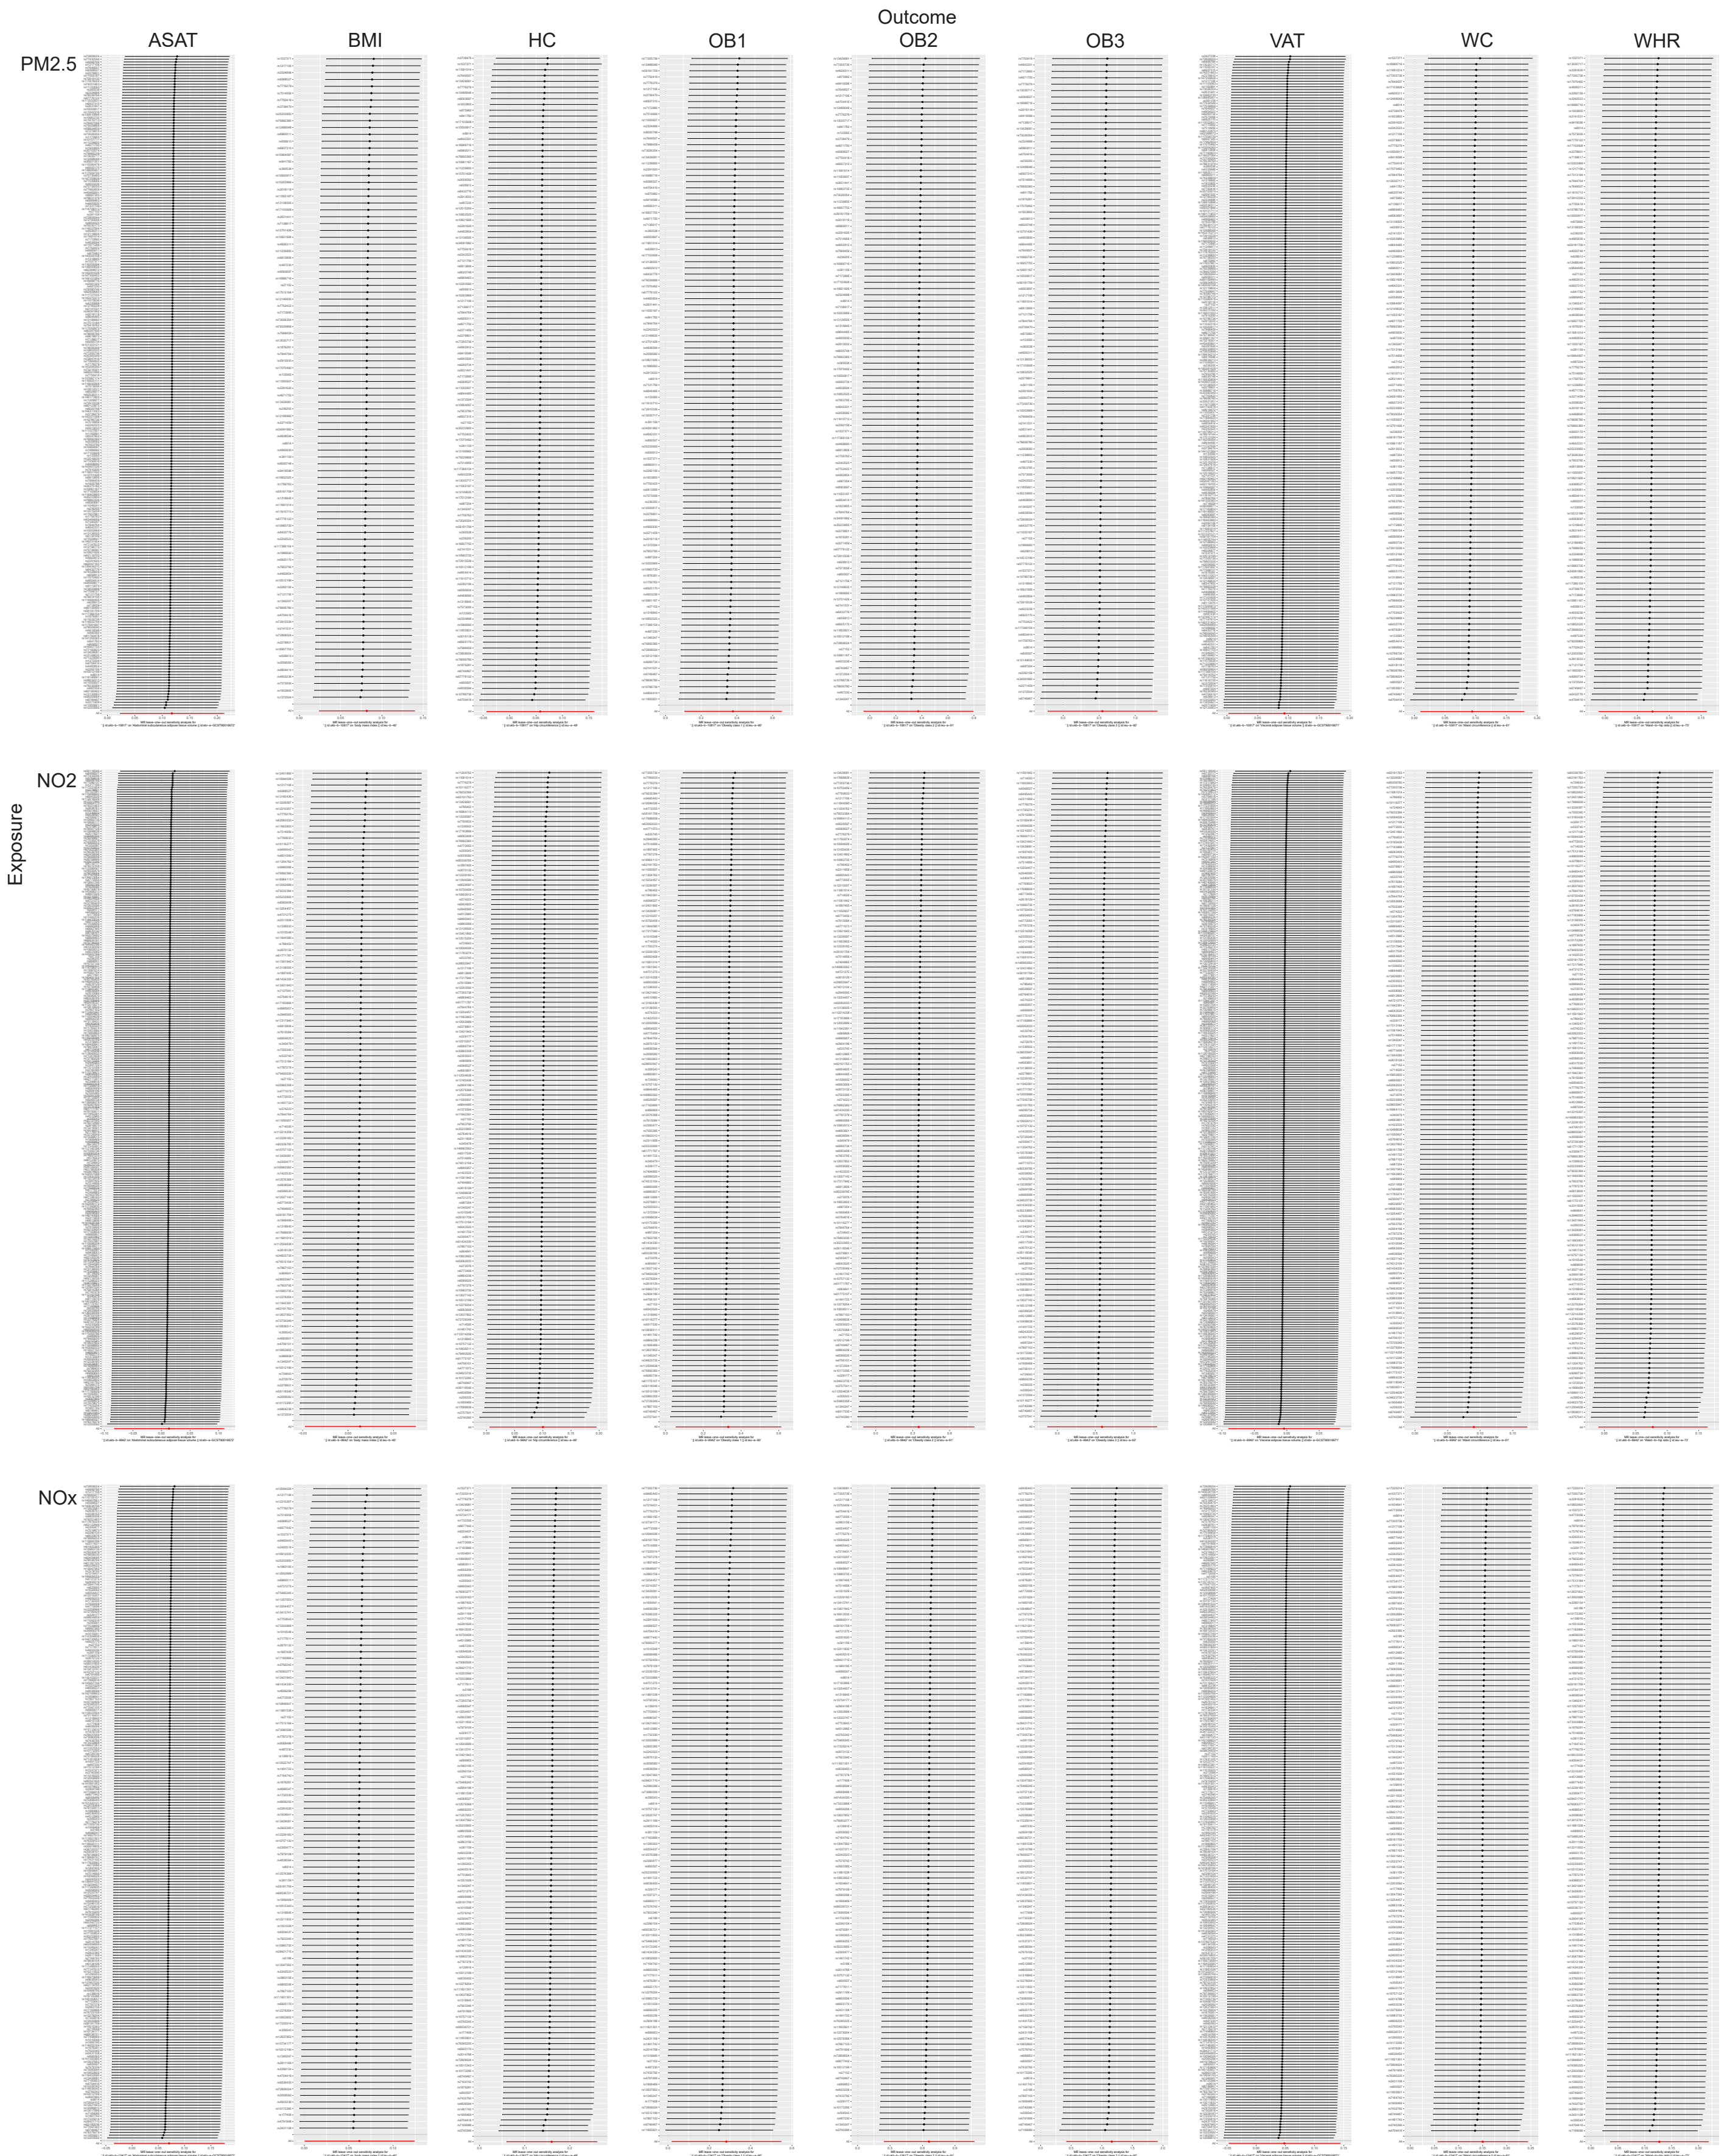

Supplementary Figure 1. The leave-one-out plot from genetically predicted air pollution on obesity.
